# Supplementary material
Source: publisher figshare collection journal article supplement (https://sage.figshare.com/ndownloader/files/13894439)
Supplement: Supplementary file 1 [file 13894439]

Supplemental Table 15. Original items from Victim Suffering Scale and their associated component loadings from the PCA in Study 7. \*Used in Study 8's manipulation check.

| The pins that I placed in the doll that represented my partner... | Factor 1 | Factor 2 | Included in final VSS? |
|-------------------------------------------------------------------|----------|----------|------------------------|
| really hurt them.*                                                | .82      | -.05     | Yes                    |
| caused them to feel real pain. [Study 8: caused them real harm]*  | .89      | -.04     | Yes                    |
| failed to harm them.                                              | .05      | .75      | No                     |
| were painful to them.*                                            | .83      | -.07     | Yes                    |
| didn't hurt them.                                                 | -.10     | .86      | No                     |
| inflicted actual damage to them.                                  | .88      | .07      | Yes                    |
| made them feel pain.                                              | .89      | -.05     | Yes                    |
| pained them.                                                      | .91      | -.05     | Yes                    |
| caused them to suffer.                                            | .92      | .02      | Yes                    |
| inflicted a real wound in them.                                   | .90      | .11      | Yes                    |
